# Supplementary material for: hReg-CNCC reconstructs a regulatory network in human cranial neural crest cells and annotates variants in a developmental context
Source: PubMed Central journal article supplement (PMC8024315; doi:10.1038/s42003-021-01970-0), 2021-04-06
Supplement: 42003_2021_1970_MOESM2_ESM.pdf [file 42003_2021_1970_MOESM2_ESM.pdf]

## **Supplementary Information**

hReg-CNCC reconstructs a regulatory network in human cranial neural crest cells and annotates variants in a developmental context

Zhanying Feng, Zhana Duren, Ziyi Xiong, Sijia Wang, Fan Liu\*, Wing Hung Wong\*, Yong Wang\*

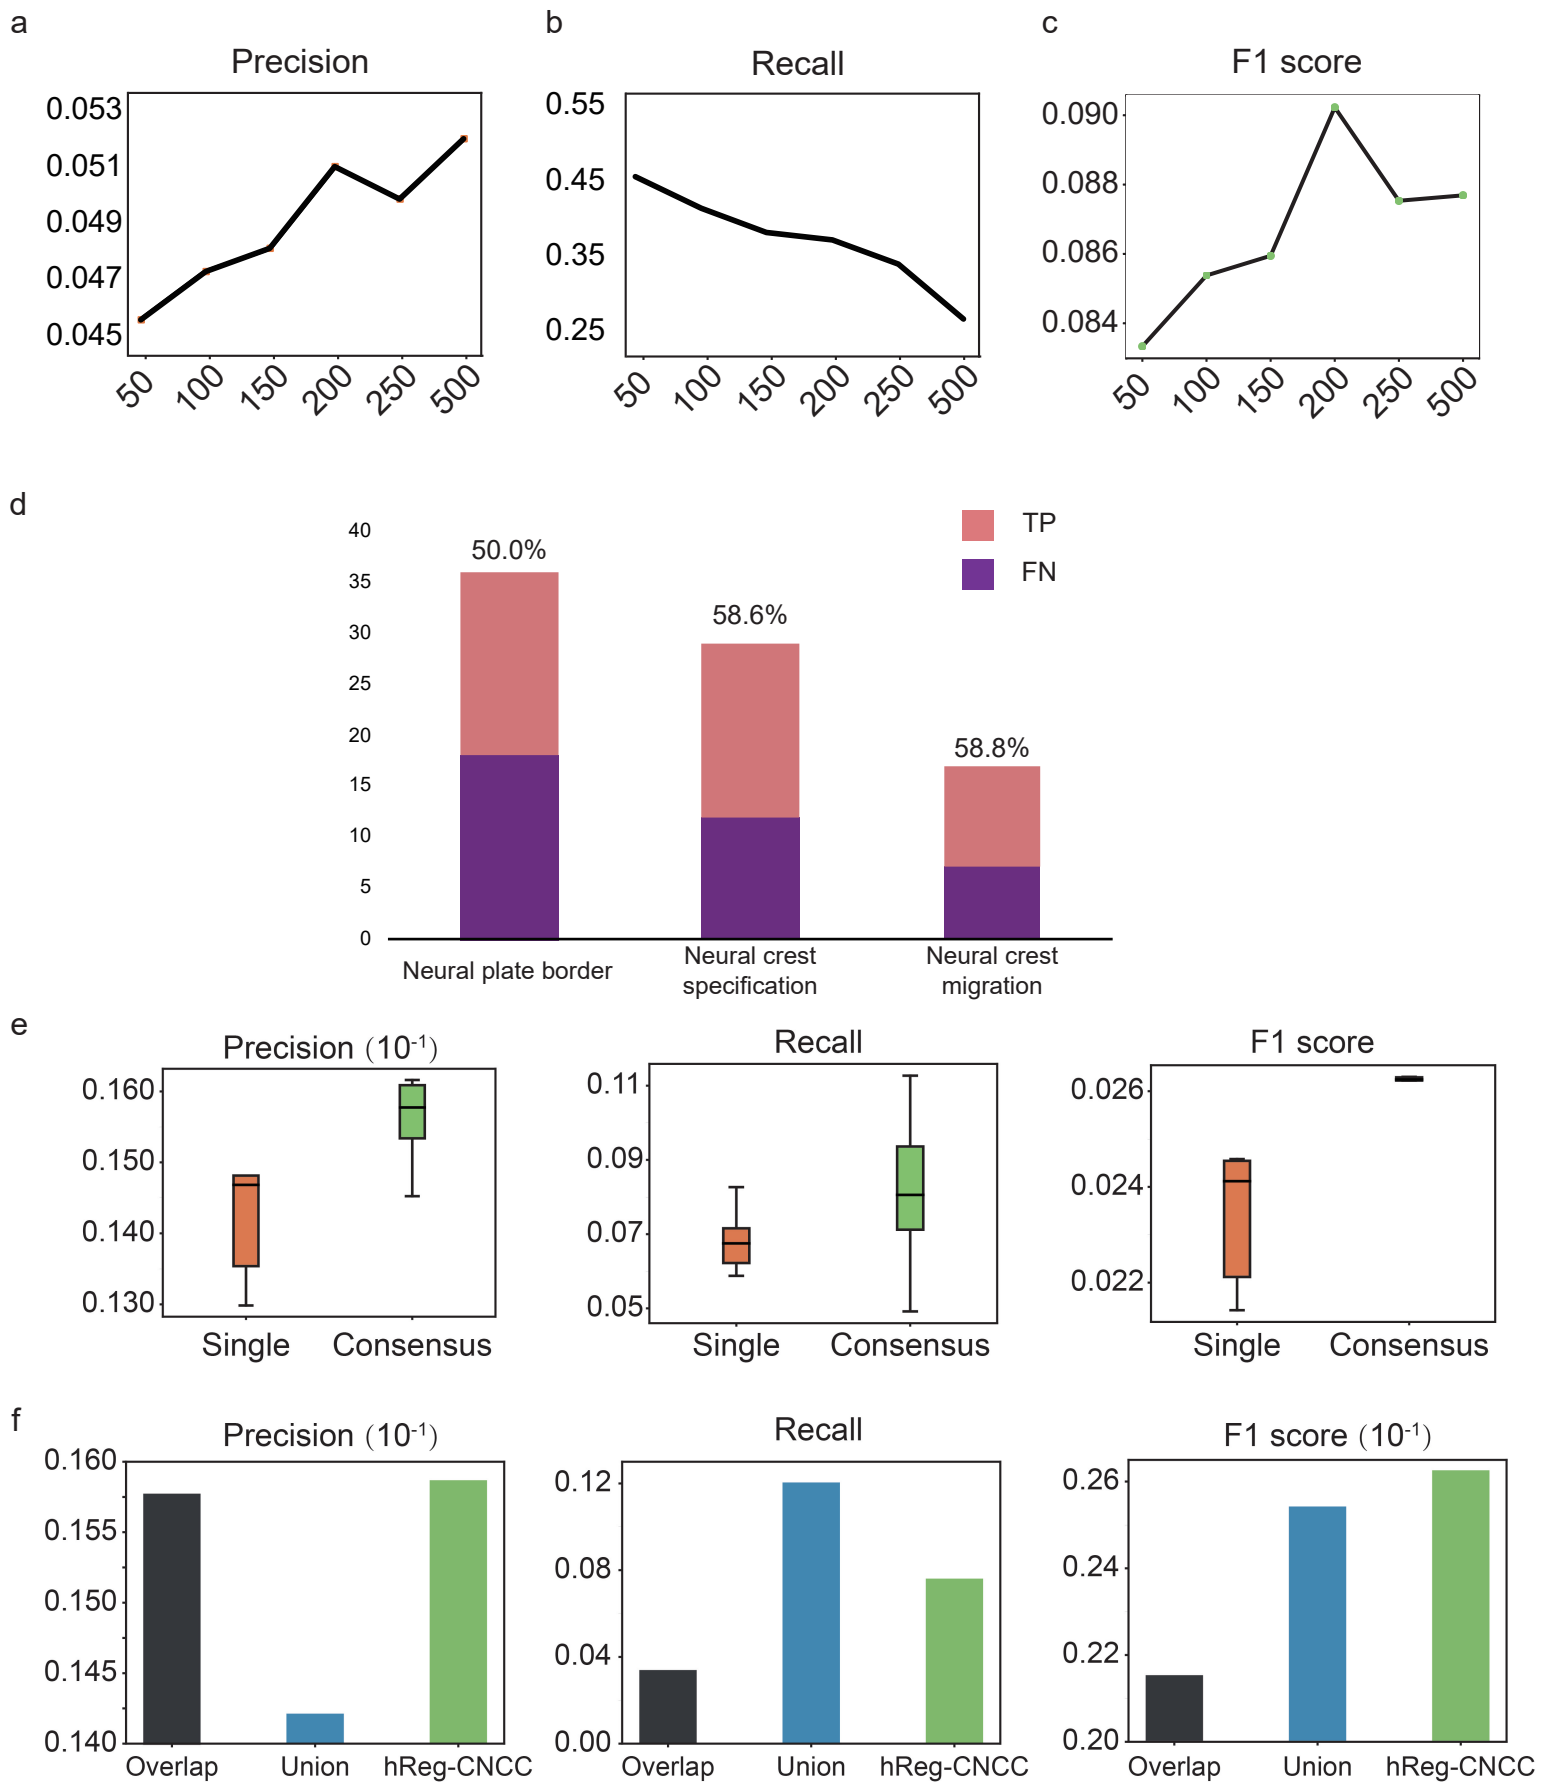

Supplementary Figure 1. Validation of hReg-CNCC shows consensus optimization obtain higher-quality regulatory network. (a-c). Precision, Recall, and F1 scores of consensus networks with different parameters (50, 100, 150, 200, 250, 500) (d). Coverage of three CNCC pathway functions in hReg-CNCC. (e). With chick -GRN as gold standard, consensus optimization achieves significantly higher precision, recall, and F1 measure than single networks. N=6 for consensus optimization and N=6 for single networks. (f). Consensus optimization outperforms the naive union and intersection methods in precision, recall, and F1 measure.

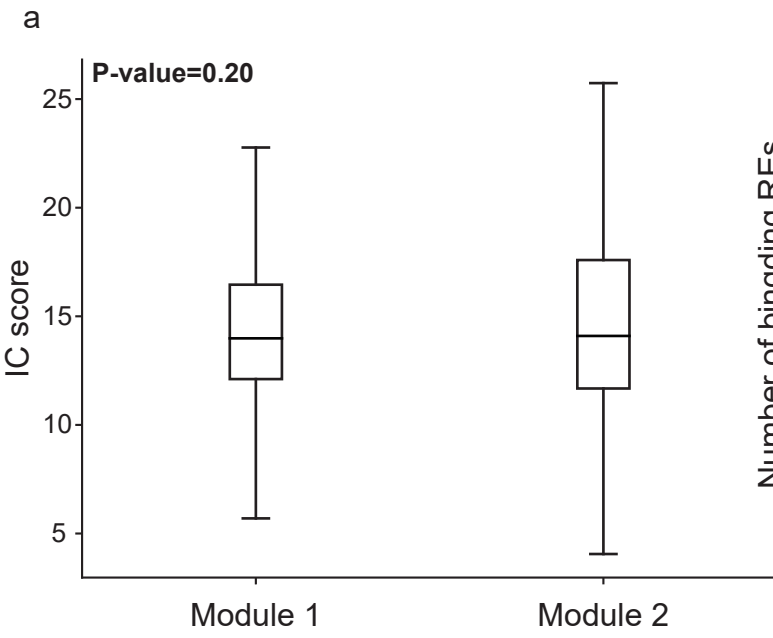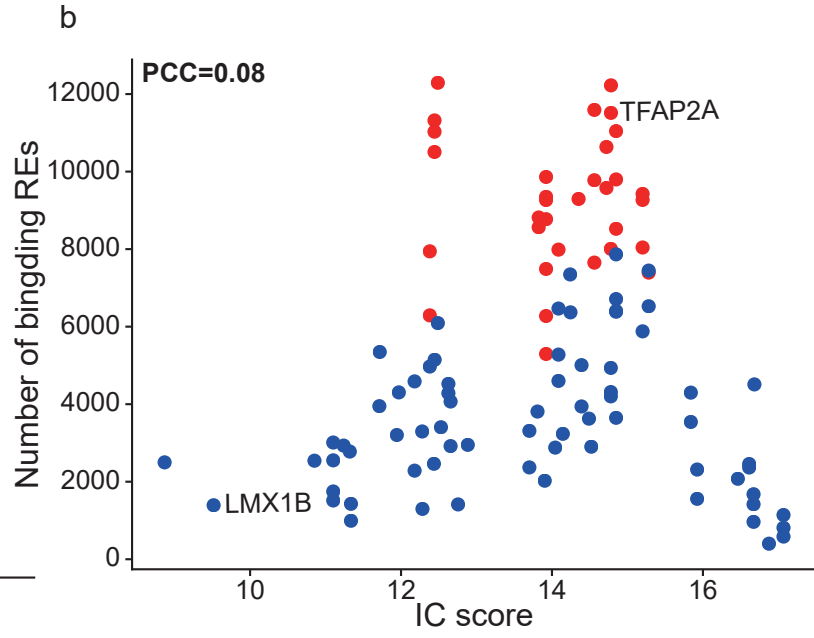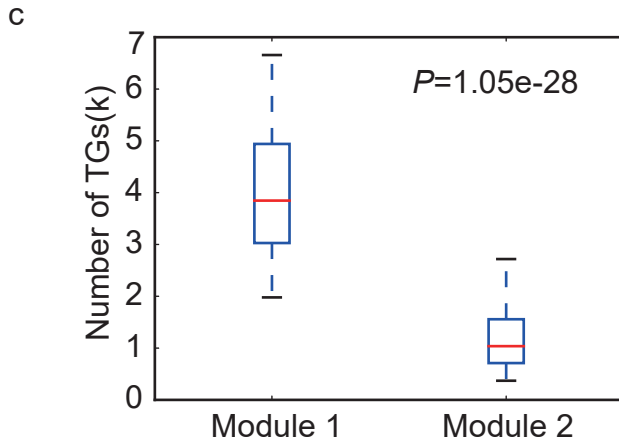

**d**

| TFs    | Tissues                                  | TFs    | Tissues                                     |
|--------|------------------------------------------|--------|---------------------------------------------|
| SIX1   | skeletal muscle                          | DLX1   | in vitro differentiated neuronal progenitor |
| SIX2   | in vitro differentiated fibroblast       | MSX1   | Schwann cell                                |
| RFX3   | prostate epithelial cell                 | BARX1  | spleen                                      |
| ZIC2   | caudate                                  | MSX2   | embryoid body differentiation 2             |
| ZIC1   | caudate; cerebellar vermis               | TCF7   | thalamus subthalamic nucleus                |
| HEY2   | heart atrium                             | TCF7L2 | thalamus                                    |
| SP3    | thalamus lateral nuclei                  | LEF1   | thalamus subthalamic nucleus                |
| ETS1   | T cell                                   | SIX4   | corpus callosum                             |
| ETV1   | cerebellar vermis                        | SOX4   | hepatic stellate cell Ito cell              |
| ETV5   | adipose tissue subcutaneous              | ELK3   | msc to chondrocyte differentiation day 3    |
| MYC    | cultured breast epithelial cell          | ETV3   | myeloid dendritic cell                      |
| ARNT2  | adrenal gland cortex(4)                  | MYBL2  | trophoblast cell                            |
| FOXO3  | prostate epithelial cell                 | AR     | cerebral cortex                             |
| TWIST1 | msc to chondrocyte differentiation day 7 | EBF1   | adipose tissue omental                      |
| TWIST2 | chondrocyte                              | SMAD3  | colon epithelial cell                       |
| EMX2   | urethra                                  | MAZ    | prostate epithelial cell                    |
|        |                                          | PATZ1  | prostate epithelial cell                    |

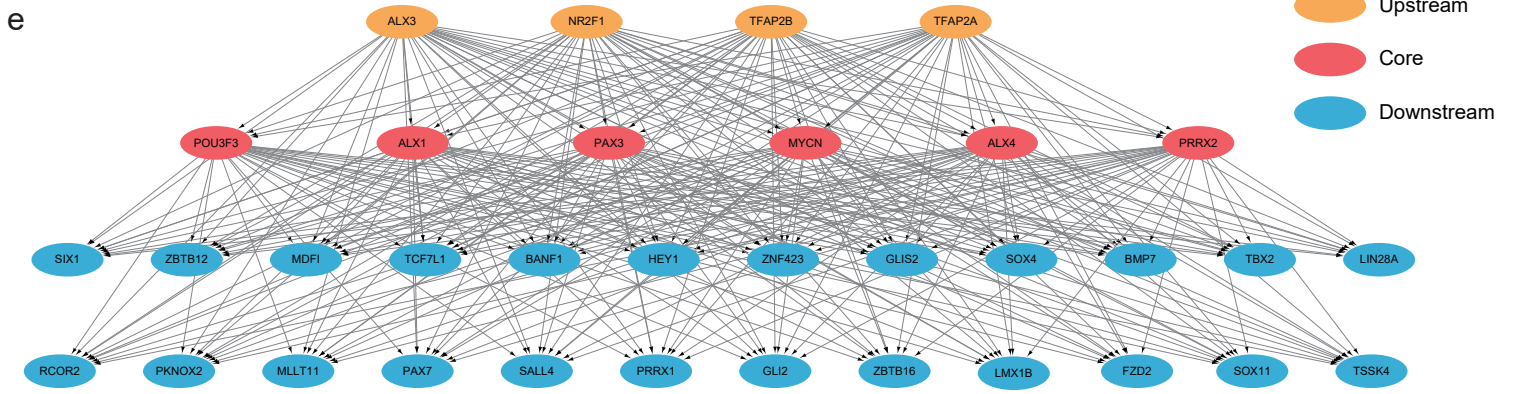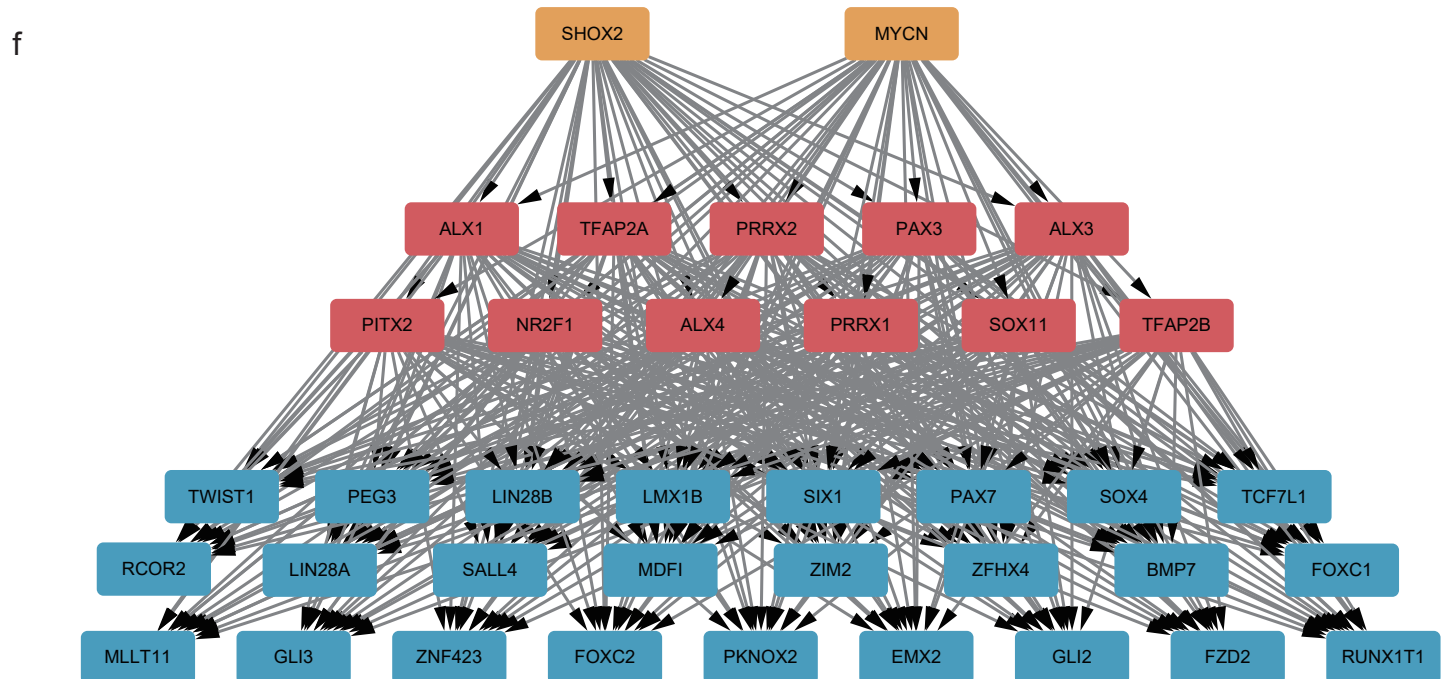

Supplementary Figure 2. Module classification is unrelated to motif information content and TFs in Module 1 show broader regulation while TFs in Module 2 show specific regulation, which is consistent with hReg-CNCC-H9. (a) Boxplot of information content (IC score) of TFs in Module 1 and Module 2. N=72 for Module 1 and N= 103 for Module 2. (b). Scatter plot shows no correlation between IC score and number of hReg-CNCC-predicted bound REs of 103 TF (32 Module 1 TFs and 71 Module 2 TFs). (c). The number of TGs regulated by TFs in Module 1 is significantly larger than that of TFs in Module 2. N=72 for Module 1 and N= 103 for Module 2. (d). TFs in Module 2 and associated tissues. (e). Dense TF network extracted from all TF set. (F). Dense TF network of hReg-CNCC-H9.

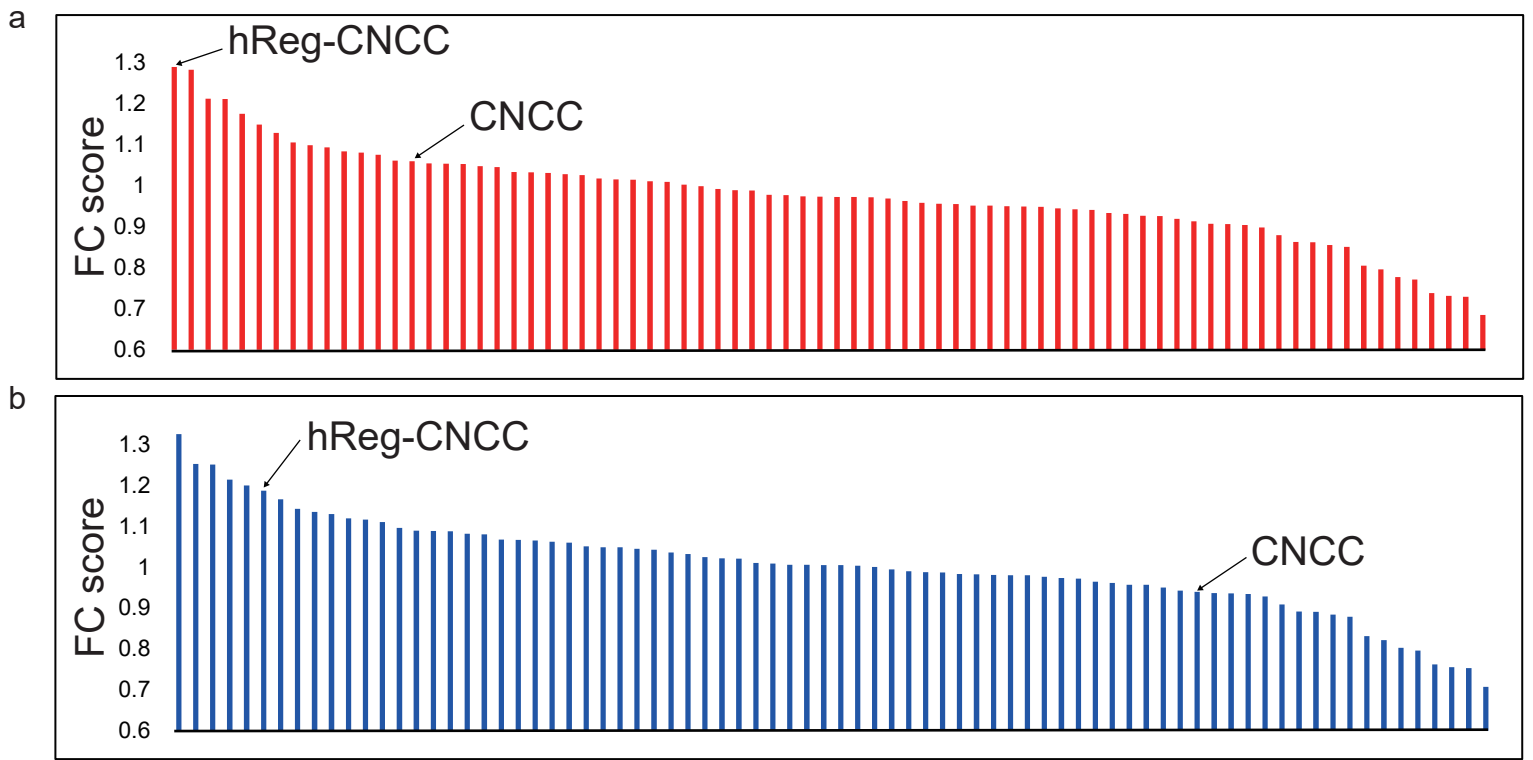

Supplementary Figure 3. The SNPs of facial morphology are more enriched in hReg-CNCC than randomly generated SNPs. (a). The ranked FC score of facial GWAS SNPs in hReg-CNCC RE set, CNCC peak set, and other 76 tissues' peak sets. (b). The ranked FC score of SNPsnap generated SNPs in hReg-CNCC RE set, CNCC peak set, and other 76 tissues' peak sets.

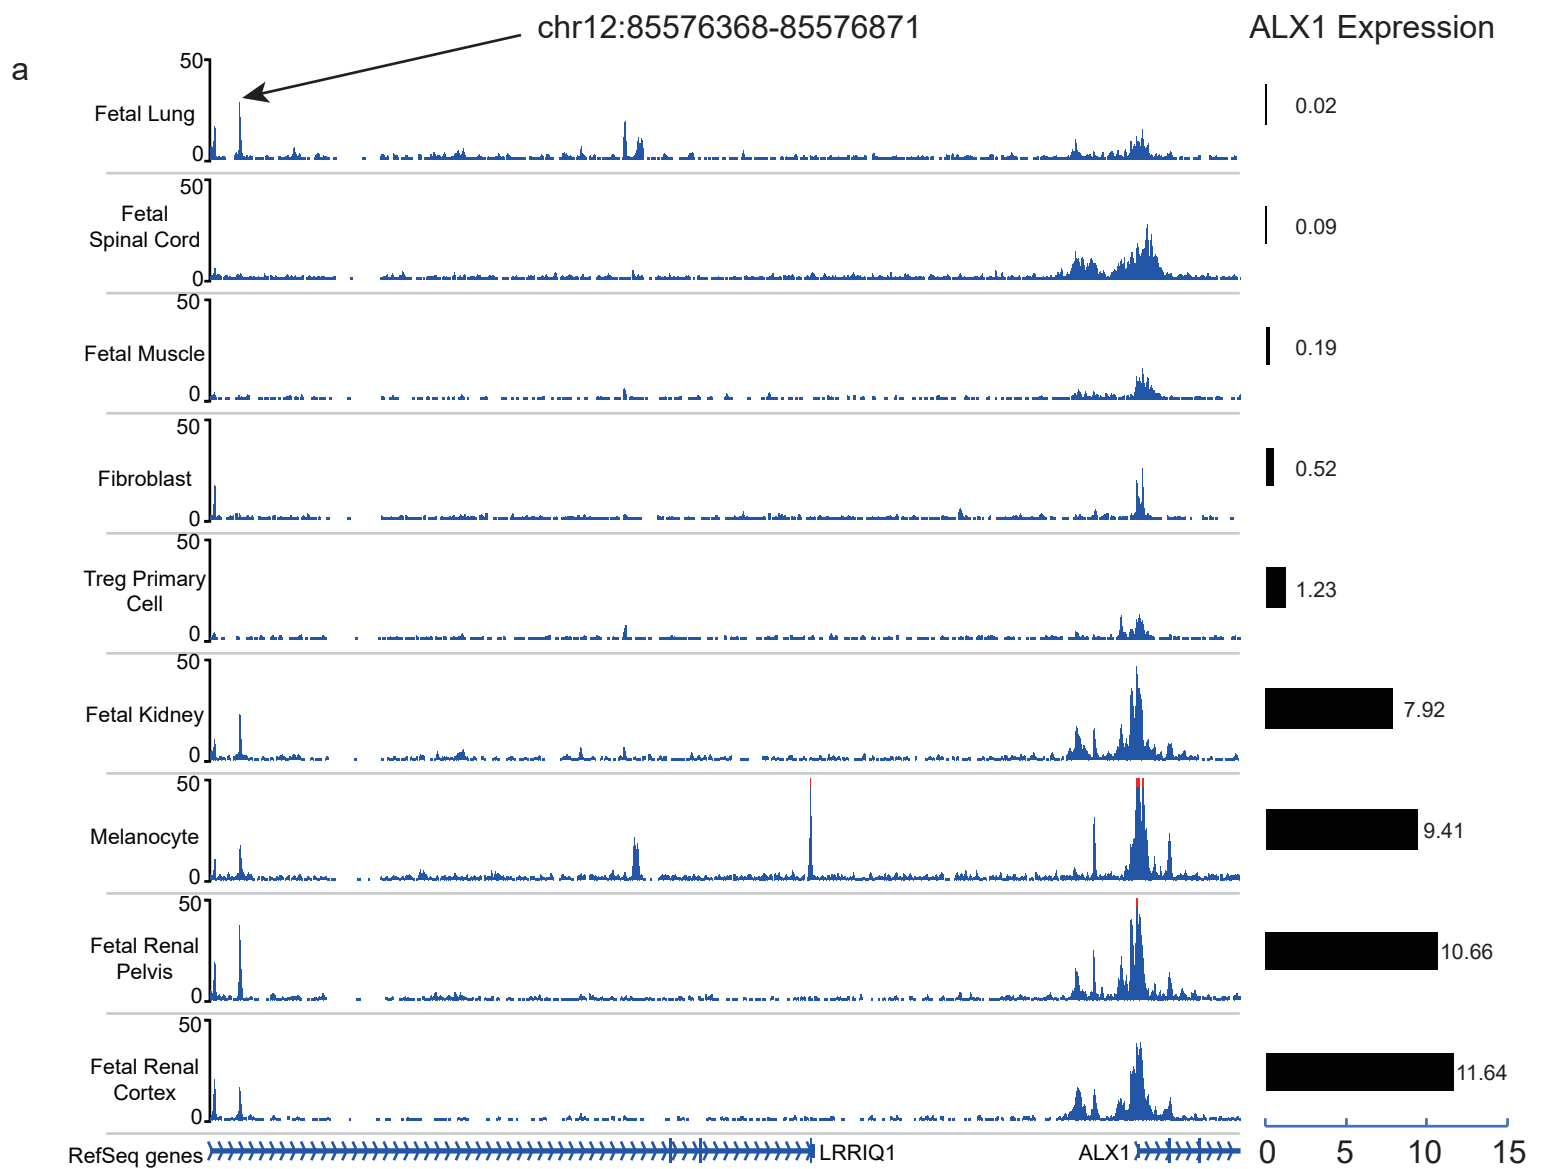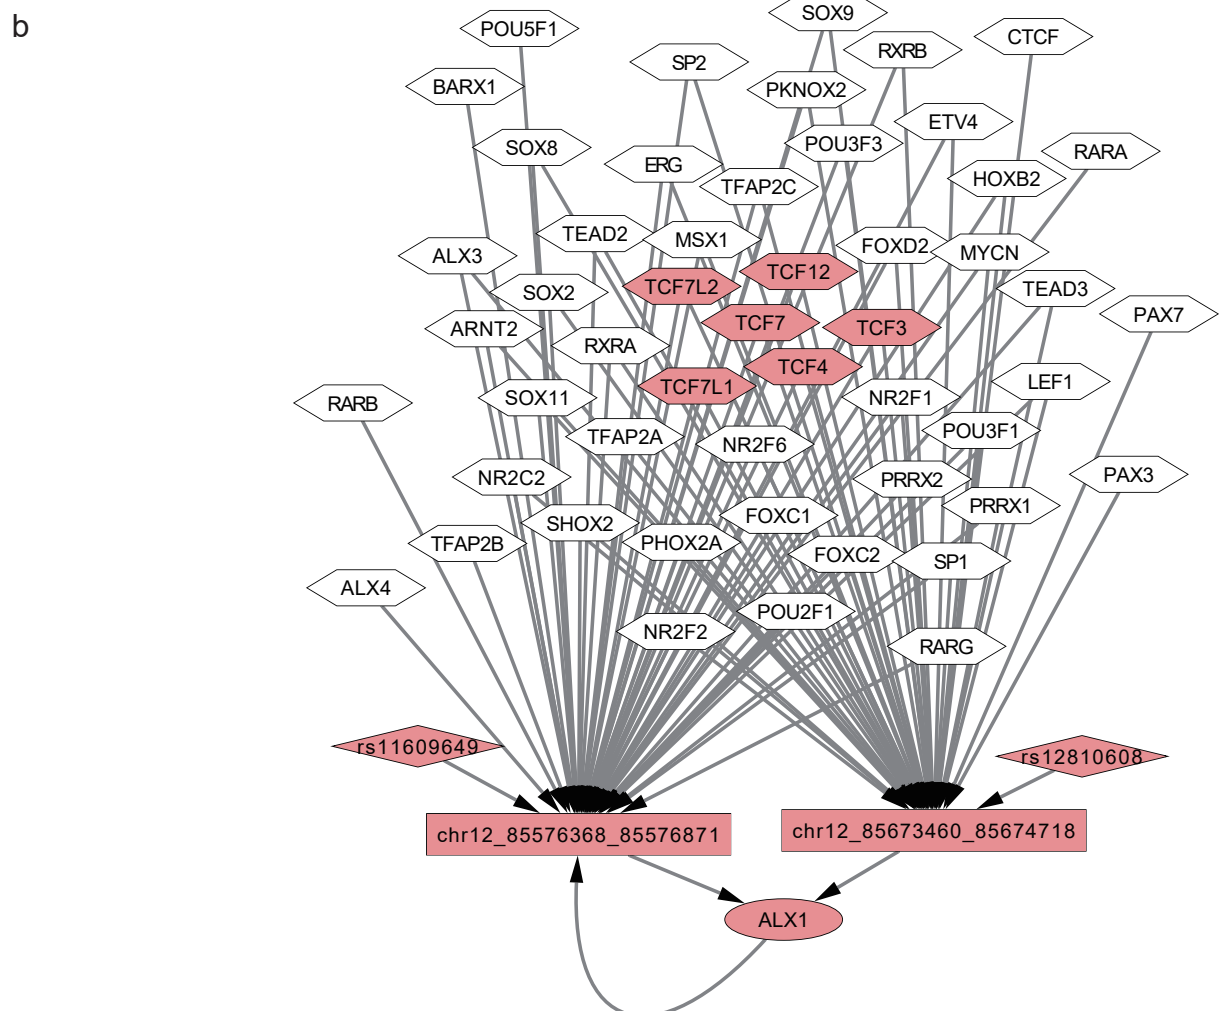

Supplementary Figure 4. hReg-CNCC reveals correlated regulators of ALX1. (a). The accessibility of “chr12:85576368-85576871” is highly correlated with expression of ALX1 across diverse samples. (b). Sub-network related to ALX1 in hReg-CNCC. TCF cluster is important regulators to ALX1.

a

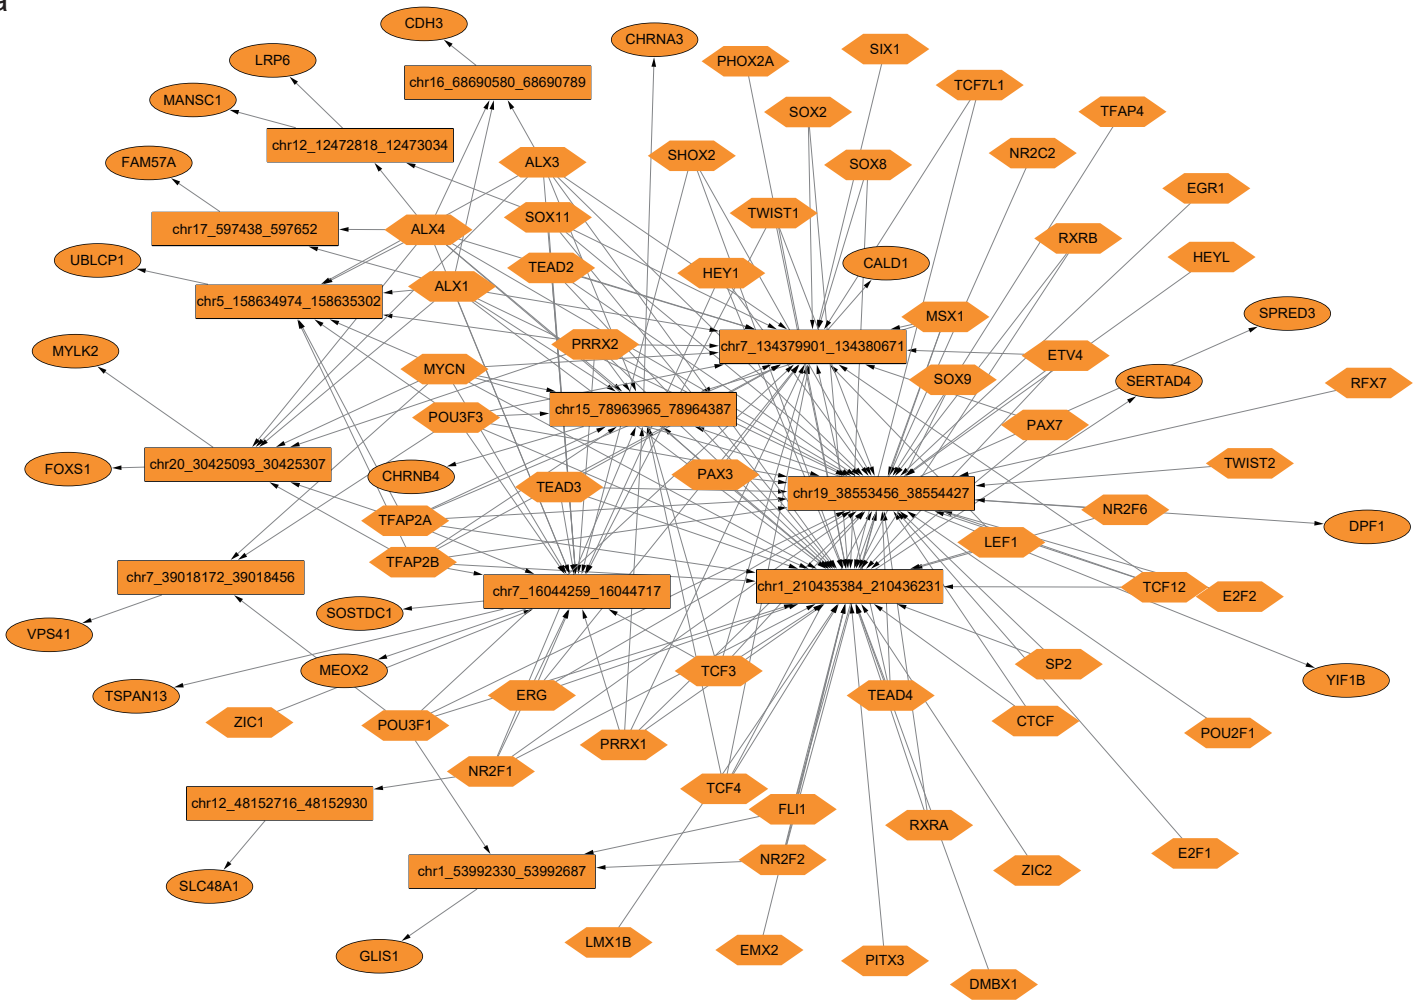

b

| RE                       | SNP_Pvalue_Trait                                                     |
|--------------------------|----------------------------------------------------------------------|
| chr1:210436017-210436248 | rs12023563_0.02646_P106                                              |
| chr12:48152927-48153096  | rs12813049_0.1098_P112,rs1548518_0.01071_P117,rs76776452_0.002707_P6 |
| chr15:78964052-78964383  | rs12905641_0.0007578_P50                                             |
| chr5:158635027-158635329 | rs193261336_0.1025_P116,rs6556405_0.06327_P127                       |
| chr7:16044296-16045148   | rs1029718_0.02248_P4,rs17169204_0.002407_P167                        |

c

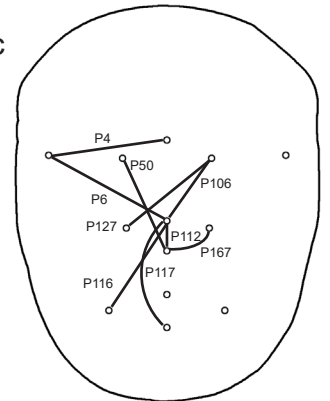

d

| RE                      | Human Mean  | Chimp Mean  | Fold     |
|-------------------------|-------------|-------------|----------|
| chr20_30425093_30425307 | 6.473344666 | 0           | 647.3345 |
| chr19_38553456_38554427 | 10.16852625 | 0.069969323 | 127.1553 |
| chr7_134379901_13438067 | 15.81354307 | 0.137822416 | 106.9766 |
| chr12_12472818_12473034 | 6.252109715 | 0.205441921 | 29.01993 |
| chr15_78963965_78964387 | 5.184282538 | 0.174702023 | 28.06836 |
| chr1_210435384_21043623 | 16.04605393 | 0.562641918 | 28.0211  |
| chr5_158634974_15863530 | 11.75895331 | 0.567055574 | 20.37751 |
| chr12_48152716_48152930 | 6.053316719 | 0.512560927 | 11.58394 |
| chr7_16044259_16044717  | 8.06830975  | 0.831727427 | 9.585419 |
| chr7_39018172_39018456  | 12.62150071 | 1.926436149 | 6.517902 |
| chr16_68690580_68690789 | 3.400224537 | 0.730882755 | 4.589423 |
| chr17_597438_597652     | 3.810254501 | 0.969611622 | 3.889556 |
| chr1_53992330_53992687  | 5.292622778 | 1.564873507 | 3.360665 |



Supplementary Figure 5. Annotating Human accelerated regions (HARs) with hReg-CNCC reveals biological insights associated with face. (a). HARs were annotated by hReg-CNCC. (b). The HAR associated SNPs and face distances. (c). The HAR associated face distances are involved with nose area. (d). The average openness value in human and chimpanzee of 13 HARs in the annotated network.

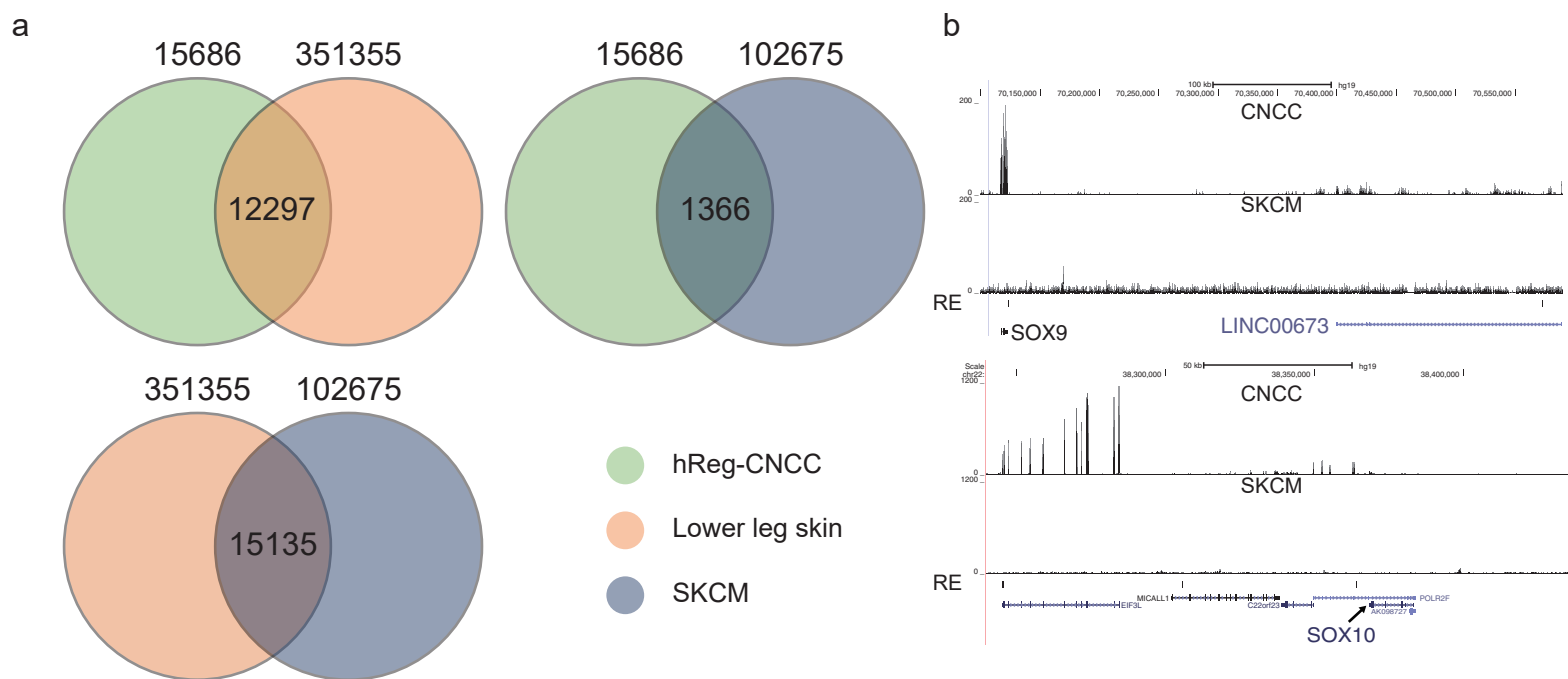

Supplementary Figure 6. Application of hReg-CNCC to study cancer (Skin Cutaneous Melanoma, SKCM) of CNCC derivatives. (a). Overlapping of REs in hReg-CNCC, ATAC-seq peaks of “lower leg skin”, and “SKCM”. (b). The REs regulating SOX9 and SOX10 were inactive in SKCM. We collected ATAC-seq peaks for SKCM of TCGA at <https://gdc.cancer.gov/about-data/publications/ATACseq-AWG>. To make comparison with normal tissue, we collected tissue of “lower leg skin” in ENCODE under accession ENCSR864IGD. We overlapped the 15,686 REs in hReg-CNCC with ATAC-seq peaks of “lower leg skin” and “SKCM” respectively. We found that 12,297 of the hReg-CNCC’s REs (78.39%) were also accessible in the normal “lower leg skin”, which indicated that the neural crest derivatives shared some of the epigenomic landscape of neural crest. However, only 1,366 REs (8.71%) in hReg-CNCC were accessible in “SKCM” (a). And the REs that regulated important NC TFs, such as SOX9/10, were all inactive in SKCM (b). This different overlapping ratios with hReg-CNCC between normal skin and skin cancer were consistent with the huge difference between normal skin and skin cancer (a). These observations showed that hReg-CNCC held the promise to study the pathology of cancer.
